# Supplementary material for: Production of furfural from xylose and corn stover catalyzed by a novel porous carbon solid acid in γ-valerolactone
Source: Royal Society of Chemistry journal article supplement (doi:10.1039/c7ra03995f), 2017-01-01
Supplement: c7ra03995f1.pdf [file c7ra03995f1.pdf]

## **Supplemental materials for:**

### **Production of furfural from xylose and corn stover catalyzed by a novel porous carbon solid acid in $\gamma$ -valerolactone**

Yuanshuai Zhu<sup>a</sup>, Wenzhi Li<sup>a,\*</sup>, Yijuan Lu<sup>a</sup>, Tingwei Zhang<sup>a</sup>, Hasan Jameel<sup>b</sup>, Houmin Chang<sup>b</sup>, Longlong Ma<sup>c</sup>

<sup>a</sup> Department of Thermal Science and Energy Engineering, University of Science and Technology of China, Laboratory of Basic Research in Biomass Conversion and Utilization, Hefei 230026, PR China

<sup>b</sup> Department of Forest Biomaterials, North Carolina State University, Raleigh, NC 27695-8005, USA

<sup>c</sup> CAS Key Laboratory of Renewable Energy, Guangzhou Institute of Energy Conversion, Chinese Academy of Sciences, Guangzhou 510640, PR China.

\*Corresponding author. Tel.: +86 0551 63600786

E-mail address: liwenzhi@ustc.edu.cn (Wenzhi Li)

**Figure captions:**

**Fig S1.** TEM images of RFC (A) and S-RFC (B)

**Fig S2.** FT-IR spectra of RFC and S-RFC

**Fig S3.** S 2p XPS spectra of S-RFC

**Table captions:**

**Table S1.** Deactivation study of S-RFC

**Table S2.** S content of reused S-RFC

**Table S1.** Deactivation study of S-RFC.<sup>a</sup>

| Run      | 1 <sup>st</sup> | 2 <sup>nd</sup> | 3 <sup>rd</sup> | 4 <sup>th</sup> | 5 <sup>th</sup> | 6 <sup>th</sup> <sup>b</sup> | 7 <sup>th</sup> <sup>c</sup> |
|----------|-----------------|-----------------|-----------------|-----------------|-----------------|------------------------------|------------------------------|
| Furfural | 76.2            | 74.7            | 73.1            | 69.5            | 45              | 35%                          | 25%                          |

yield (%)

<sup>a</sup> Reaction conditions: 0.6 g S-RFC, 0.8 g xylose, 32 ml GVL, 170°C, 5 min reaction time, 25 min heating-up time.

<sup>b</sup> The catalyst was regenerated by a new sulfonation cycle

<sup>c</sup> The catalyst was regenerated by removal of deposits

**Table S2.** S content of reused S-RFC.

| Catalyst           | fresh | Run 1 | Run 2 | Run 3 | Run 4 | Run 5 |
|--------------------|-------|-------|-------|-------|-------|-------|
| Sulfur content (%) | 2.75  | 2.7   | 2.5   | 2.4   | 2.1   | 1.5   |

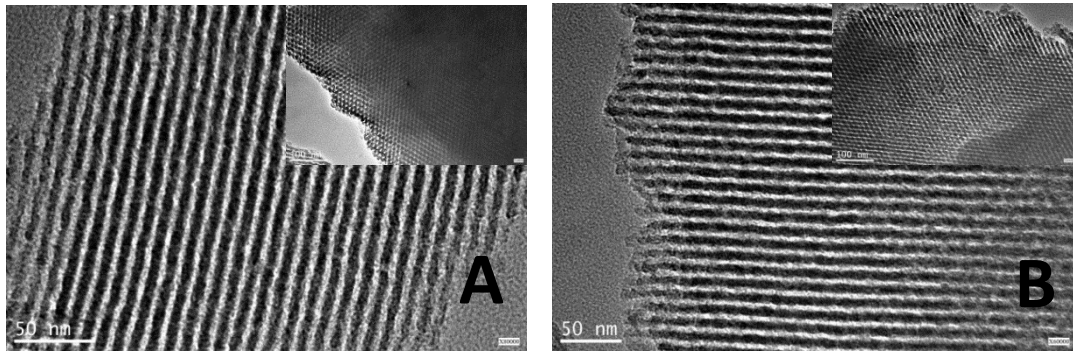

**Fig S1.** TEM images of RFC (A) and S-RFC (B)

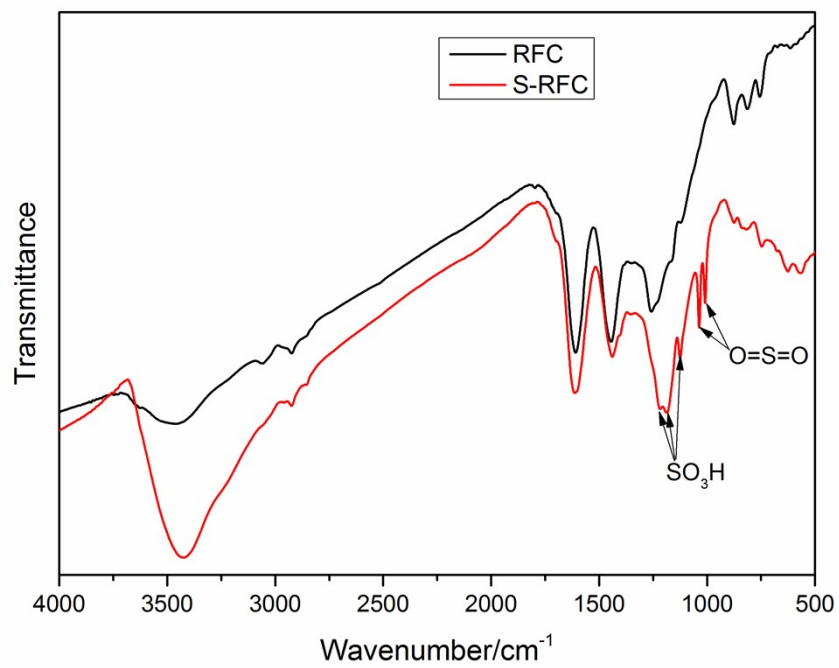

**Fig S2.** FT-IR spectra of RFC and S-RFC

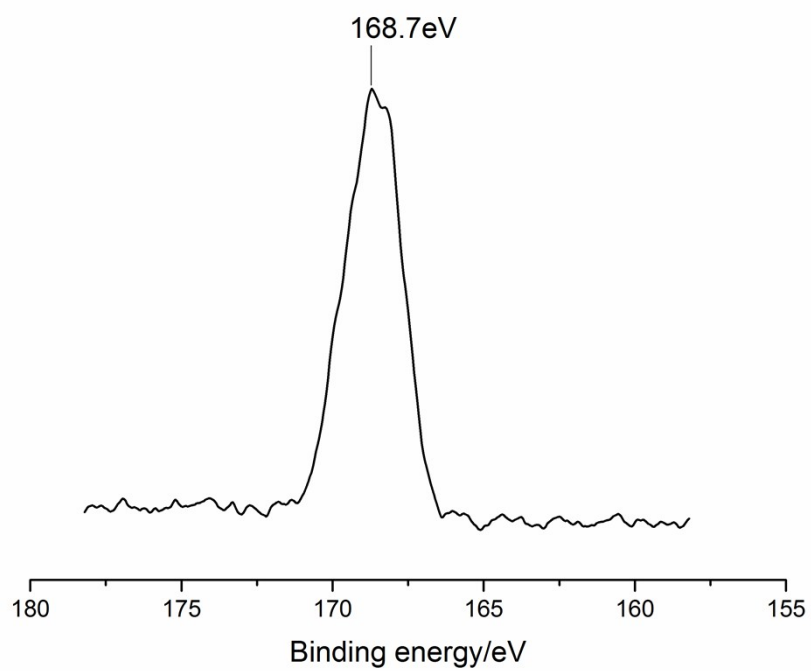

**Fig. S3** S 2p XPS spectra of S-RFC
